# Supplementary material
Source: HighWire-hosted journal article supplement (https://bmjopen.bmj.com/content/12/2/e052058)
Supplement: inline-supplementary-material-1 [file inline-supplementary-material-1.pdf]

**Borang soal selidik latar belakang***Socio-demographic questionnaire***Latar belakang***Background*Umur(*Age*) : \_\_\_\_\_Jantina(*Gender*) : \_\_\_\_\_Bangsa(*Ethnicity*) : \_\_\_\_\_Status perkahwinan (*Marital status*):Bujang(*Single*)/Bercerai (*Divorced*)/Berkahwin(*Married*)Tahap pendidikan tertinggi (*Highest educational level achieved*):Rendah(*Primary*)/Menengah (*Secondary*)/Pengajian Tinggi (*Tertiary*)Pekerjaan (*Occupation*) : \_\_\_\_\_

Pengalaman berkerja (work experience) : ..... /tahun(year)

Anggaran pendapatan isi rumah

(*Estimated family income*): RM \_\_\_\_\_ /bulan(month)**Informasi mengenai asma**

## Information about asthma

Adakah anda menghidap asma (*Do you have asthma*)?Ya (*yes*)/ Tidak (*No*)Adakah ahli keluarga menghidap asma (*Anyone in your family has asthma*)?Ya (*yes*)/ Tidak (*No*)Jika Ya, sila nyatakan (*If yes, (please specify)*):

\_\_\_\_\_
